# Supplementary material for: Identification and Expression Analysis of Sugar Transporter Gene Family in Aspergillus oryzae
Source: Hindawi journal article supplement (doi:10.1155/2020/7146701), 2020-11-07
Supplement: f1 [file 7146701.f1.pdf]

**Table S1: Primers used in this study.**

| <b>Primer</b> | <b>Sequence (5'-3')</b>      | <b>Purpose</b>            |
|---------------|------------------------------|---------------------------|
| AoSUT1-F      | GGTCGTCTACATTTGCGAGATA       | qRT-PCR of AoSUT1         |
| AoSUT1-R      | ACCACCAATCCCAGTGTAATC        | qRT-PCR of AoSUT1         |
| AoSUT5-F      | GCCCTCCCGTTCTGATTATT         | qRT-PCR of AoSUT5         |
| AoSUT5-R      | GCGATAAAGGATGACGCTACT        | qRT-PCR of AoSUT5         |
| AoSUT12-F     | GATGGAACACATGAGCATAGGA       | qRT-PCR of AoSUT12        |
| AoSUT12-R     | GCAAGCGCCTTAAATGGATTAG       | qRT-PCR of AoSUT12        |
| AoSUT23-F     | GTTCTACTCGGTTGGTTCCTTTA      | qRT-PCR of AoSUT23        |
| AoSUT23-R     | AACCATCTTCCAGTCCCATTC        | qRT-PCR of AoSUT23        |
| AoSUT35-F     | GTCACCTCGATTCTCATCTAC        | qRT-PCR of AoSUT35        |
| AoSUT35-R     | CTGAACCACTTCGTCCTCTT         | qRT-PCR of AoSUT35        |
| AoSUT69-F     | AGAGAGTATCAGGTCTAGGTAT<br>GG | qRT-PCR of AoSUT69        |
| AoSUT69-R     | CGGTCGTGATGGGAGAATAAA        | qRT-PCR of AoFAD69        |
| 18S-F         | TTACCCAATCCCGACAC            | qRT-PCR of reference gene |
| 18S-R         | CCAGACTTGCCCTCCA             | qRT-PCR of reference gene |
