# Supplementary material for: Identification and Expression Analysis of Sugar Transporter Gene Family in Aspergillus oryzae
Source: Hindawi journal article supplement (doi:10.1155/2020/7146701), 2020-11-07
Supplement: f2 [file 7146701.f2.pdf]

Table S2: The detailed information of the proteins in PPI network

| <b>Source</b>                | <b>Target</b>                |
|------------------------------|------------------------------|
| Serine                       | AoSUT52                      |
| AoSUT97                      | Shikimate dehydrogenase      |
| AoSUT100                     | Vacuolar transport chaperone |
| AoSUT49                      | Vacuolar transport chaperone |
| Shikimate dehydrogenase      | Uncharacterized protein      |
| AoSUT67                      | Neutral trehalase            |
| AoSUT97                      | Uncharacterized protein      |
| Vacuolar transport chaperone | AoSUT109                     |
| Vacuolar transport chaperone | AoSUT33                      |
| Vacuolar transport chaperone | AoSUT26                      |
| AoSUT91                      | Vacuolar transport chaperone |
| AoSUT39                      | AoSUT67                      |
| Serine                       | AoSUT16                      |
| Serine                       | AoSUT38                      |
| AoSUT44                      | AoSUT7                       |
| AoSUT71                      | AoSUT44                      |
| AoSUT70                      | AoSUT22                      |
| AoSUT47                      | AoSUT22                      |
| AoSUT50                      | AoSUT22                      |
| AoSUT80                      | AoSUT6                       |
| AoSUT55                      | AoSUT44                      |
| AoSUT44                      | AoSUT88                      |
| AoSUT44                      | AoSUT5                       |
| AoSUT72                      | AoSUT44                      |
