# Supplementary material for: Identification and Expression Analysis of Sugar Transporter Gene Family in Aspergillus oryzae
Source: Hindawi journal article supplement (doi:10.1155/2020/7146701), 2020-11-07
Supplement: f3 [file 7146701.f3.pdf]

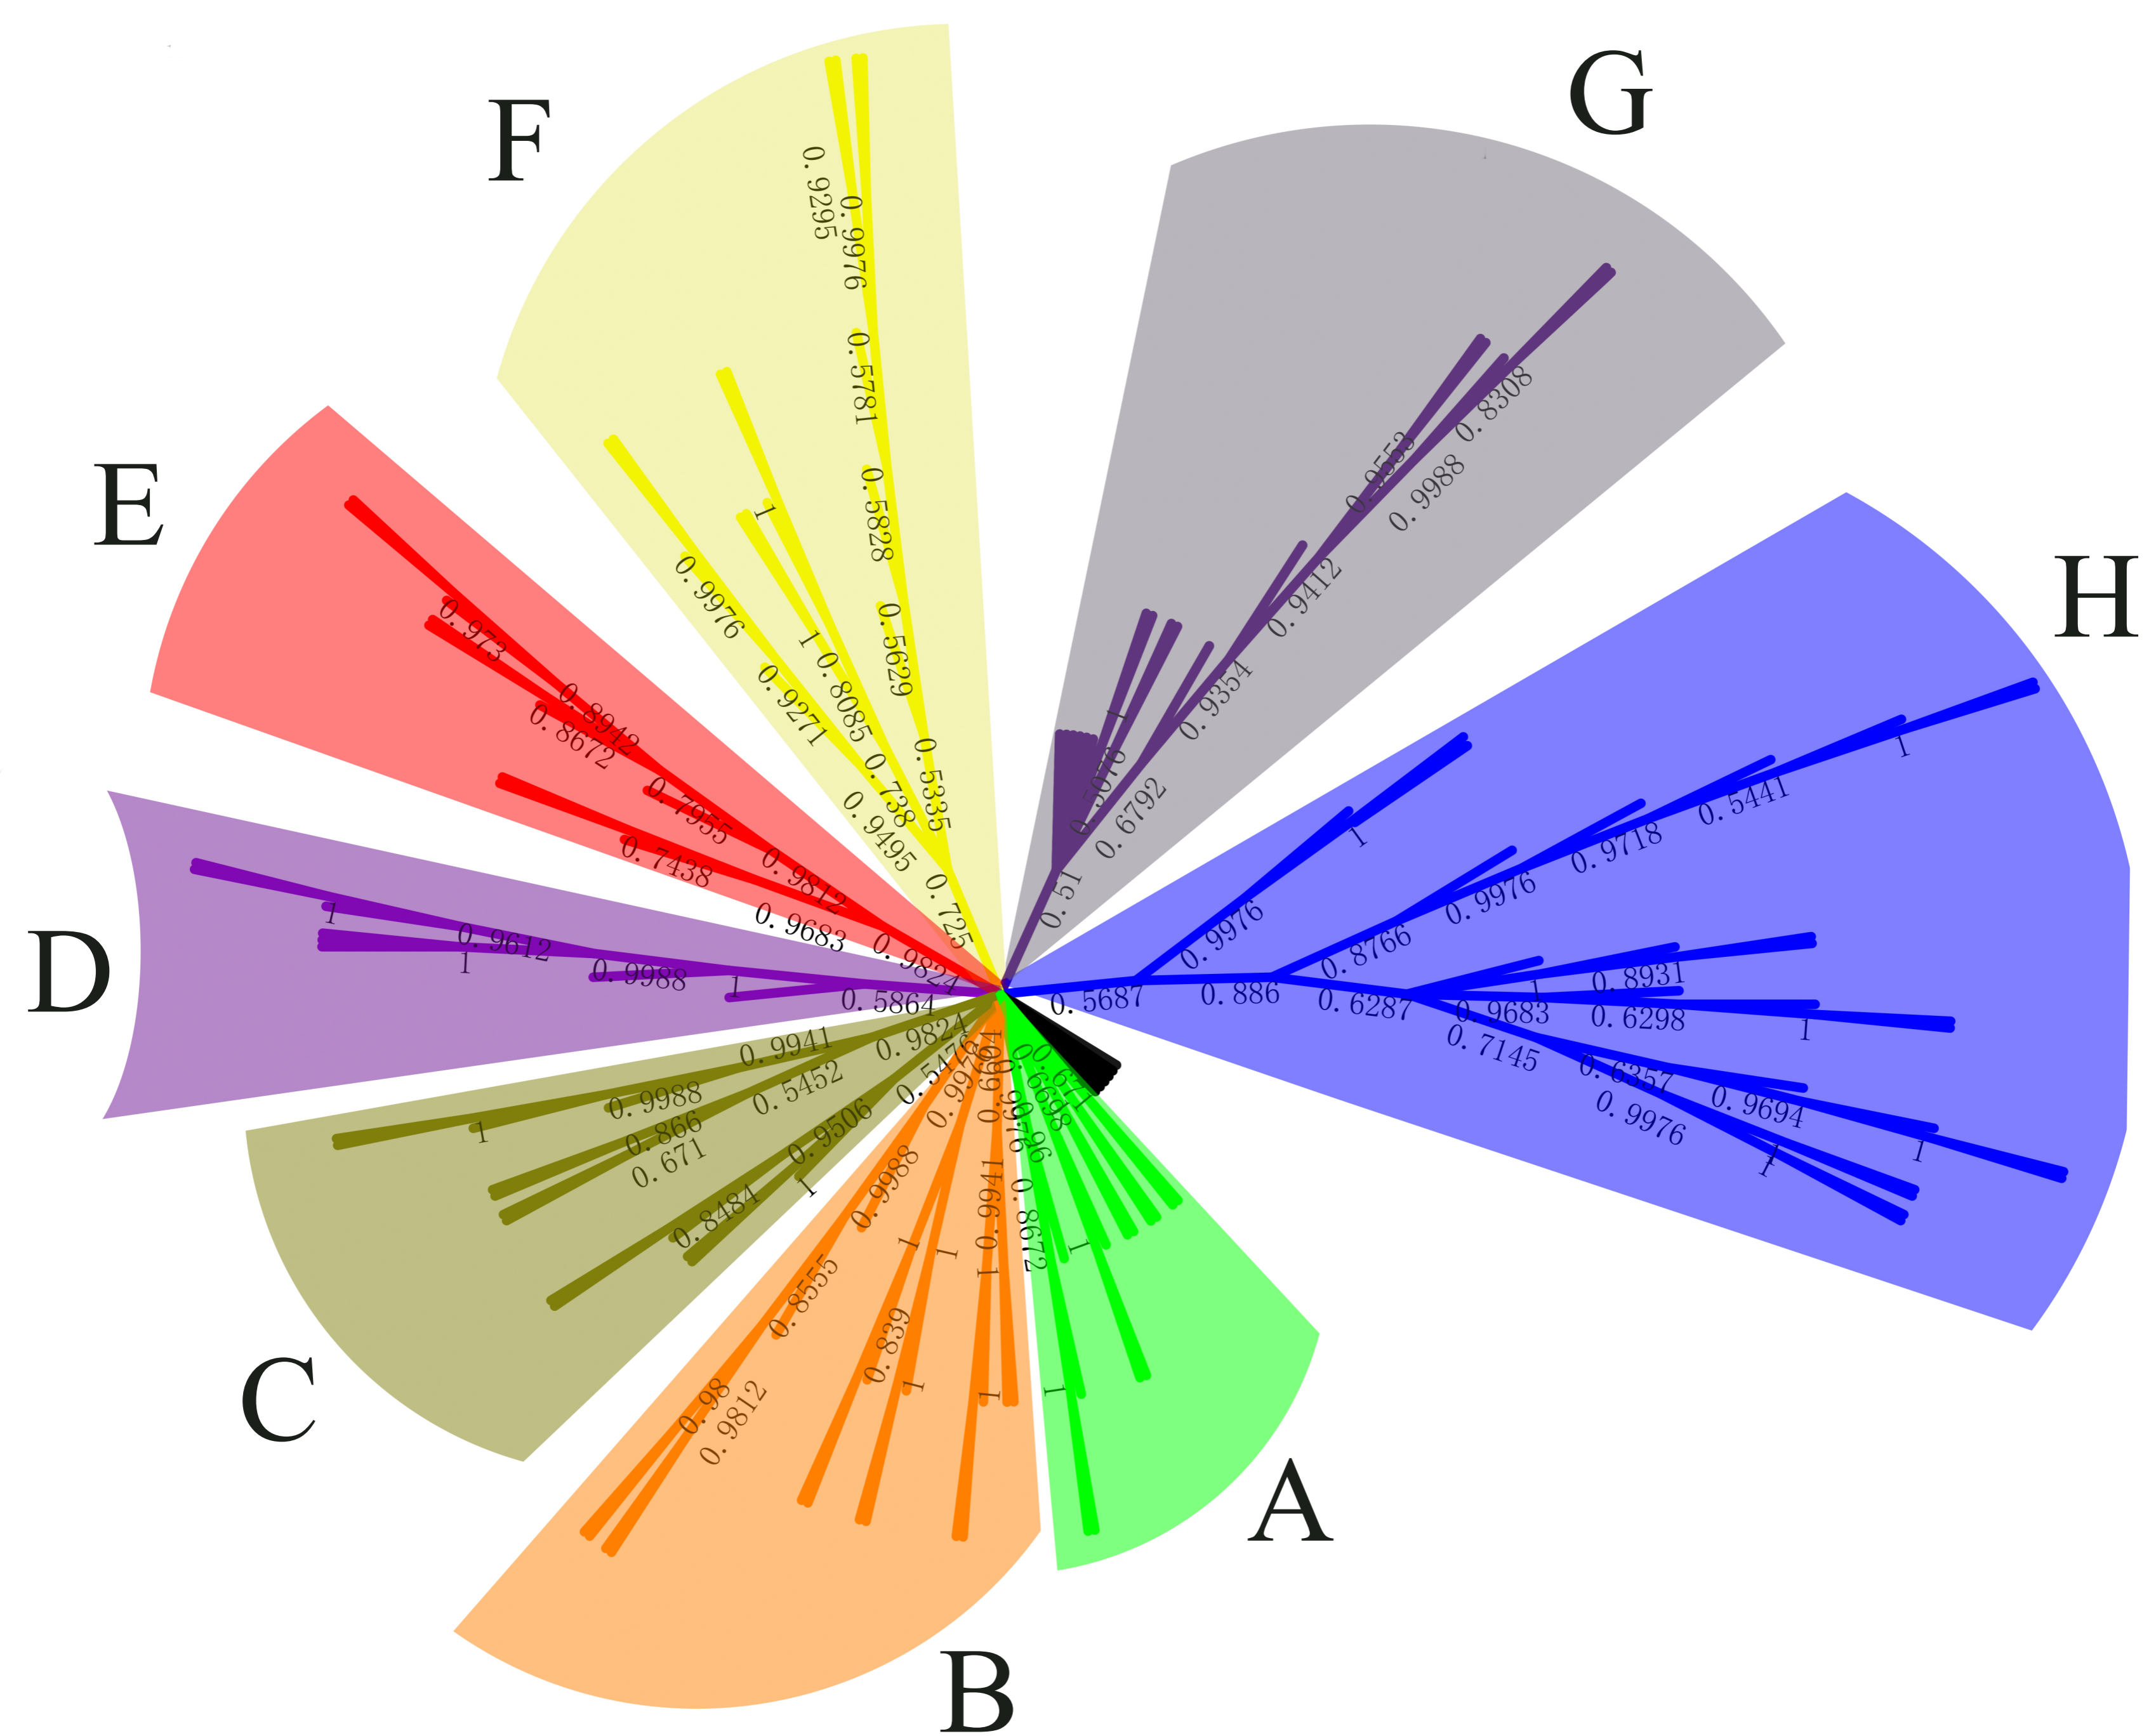

Figure S1: Phylogenetic analysis of *A. oryzae* SUT proteins. An unrooted NJ tree of *A. oryzae* SUT amino acid sequences using 1000 bootstrap replicates by MEGA X. The eight clades are marked by different colors.
