# Supplementary material for: Identification and Expression Analysis of Sugar Transporter Gene Family in Aspergillus oryzae
Source: Hindawi journal article supplement (doi:10.1155/2020/7146701), 2020-11-07
Supplement: f5 [file 7146701.f5.pdf]

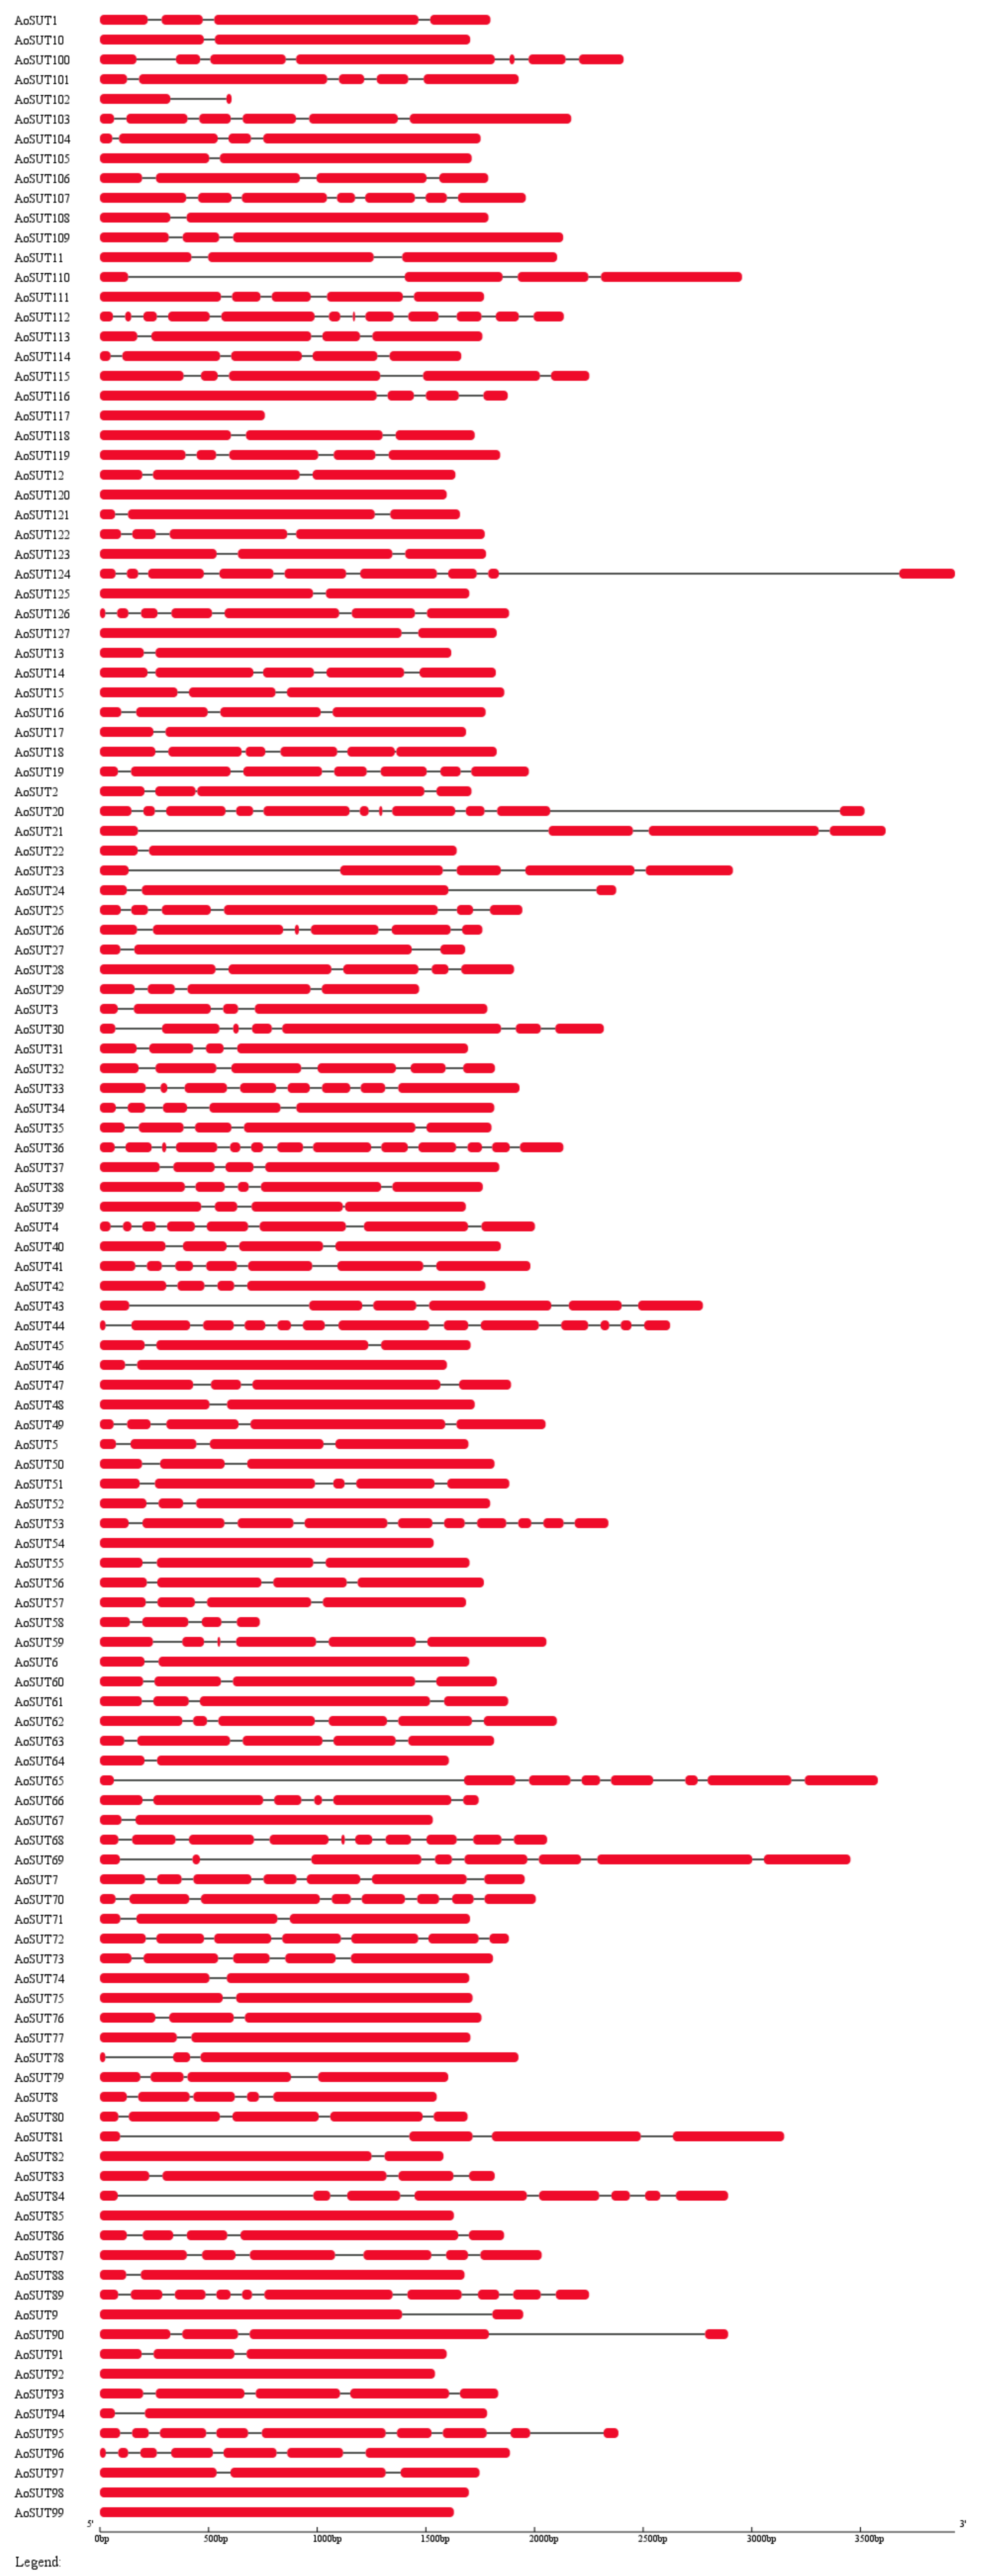

Figure S3: Exon–intron structure of 127 sugar transporter genes identified in *A. oryzae*.

Exons are shown as red boxes, and introns are shown as black lines.
