# Supplementary material for: Identification and Expression Analysis of Sugar Transporter Gene Family in Aspergillus oryzae
Source: Hindawi journal article supplement (doi:10.1155/2020/7146701), 2020-11-07
Supplement: f6 [file 7146701.f6.pdf]

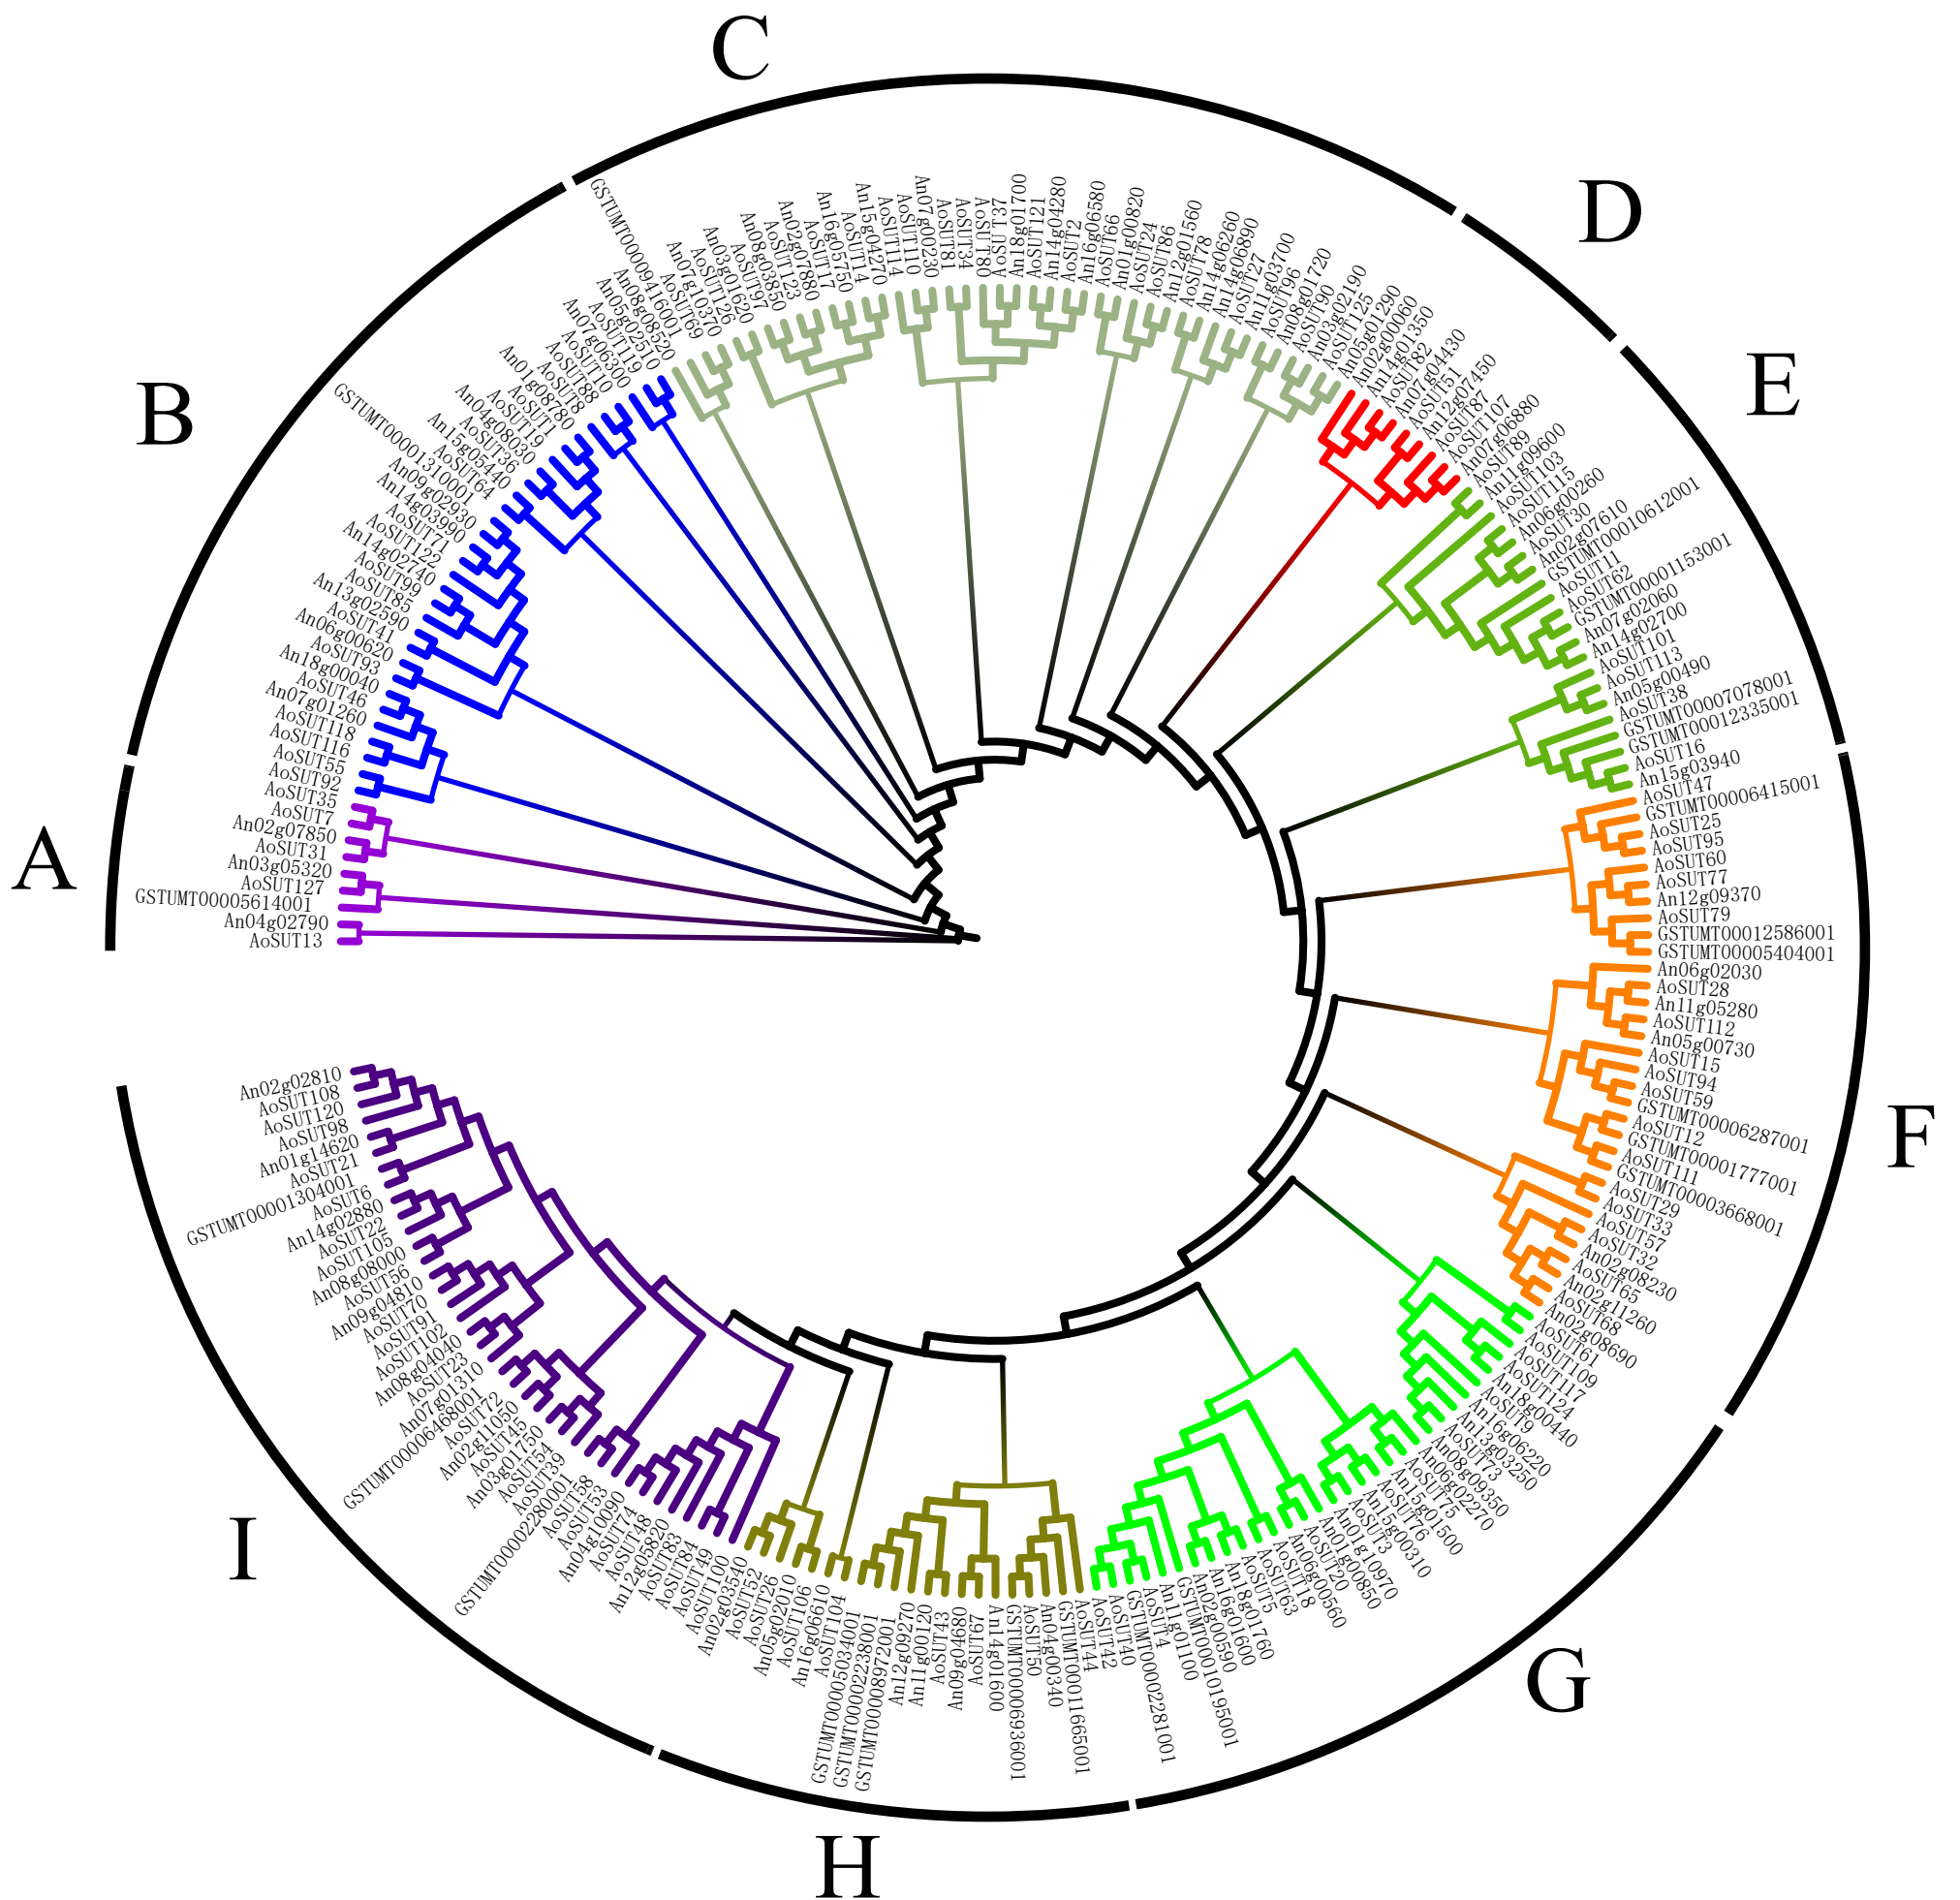

Figure S4: The phylogenetic relationship between *A. oryzae*, *A.niger* and *Tuber melanosporum* SUT proteins. The maximum likelihood tree was constructed by the MEGA X with 1 000 bootstrap replications. Nine clades were distinguished in different colors.
